# Supplementary material for: Analysis of In Vitro Osteoblast Culture on Scaffolds for Future Bone Regeneration Purposes in Dentistry
Source: Hindawi journal article supplement (doi:10.1155/2019/5420752), 2019-02-06
Supplement: f1 [file 5420752.f1.pdf]

33 **Graphical Abstract**

34

35

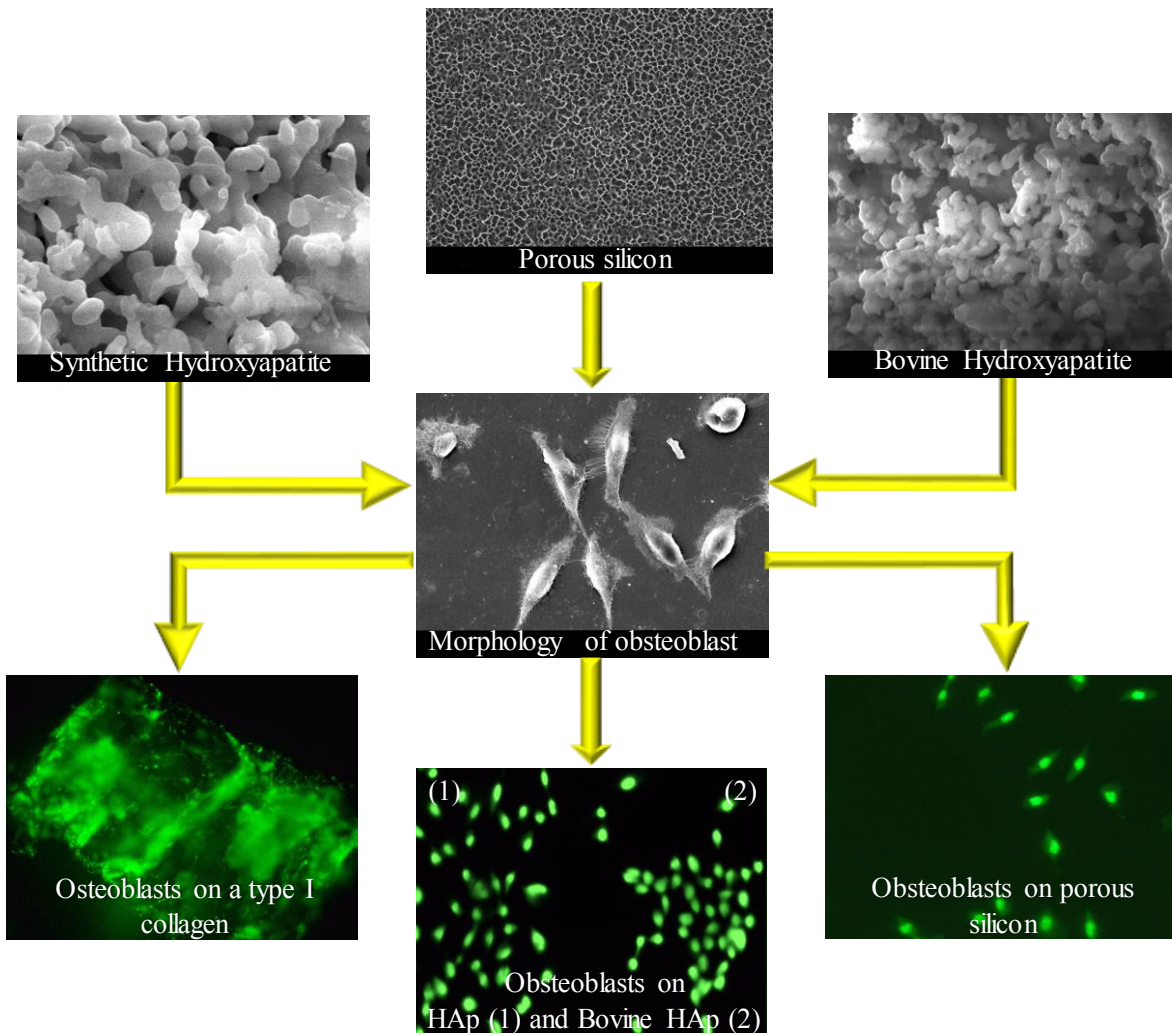

36

37

38

39

40
